# Supplementary material for: QSAR analysis of substituent effects on tambjamine anion transporters
Source: Chem Sci. 2015 Dec 8;7(2):1600–8. doi: 10.1039/c5sc03932k (PMC5964965; doi:10.1039/c5sc03932k)
Supplement: Supplementary file 3 [file SC-007-C5SC03932K-s003.csv]

Compound no	Tambjamine substituent	Compound classification group	Initial Training set	R-substituent	Ring-substituent	Enamine Substituent	R-type	grouping - enamine/ring	Hammet constant (p)	EC50 (%)	Log(1/EC50)	n	n-sq	Kini	Kini/n	1/Kini	Log(1/Kini)	n*Log (1/Kini)	Log (1/Kini)/n	Retention time	Retention time-sq	TorchLiteSlogP	TorchLiteSlogP-sq	ALOGPs	ALOGPs-sq	miLOGP	miLOGP 2	AC LogP	AC LogP-sq	ALOGP	ALOGP-sq	MLOGP	MLOGP-sq	KOWWIN	KOWWIN-sq	XLOGP2	XLOGP2-sq	XLOGP3	XLOGP3-sq	Average LogP	Average LogP-sq	Polarizability	Isoelectric point	Log P	Polar surface area	Molecular surface area	pKa (NH pirrol 1)	pKa (NH azafulveno)	Dreiding energy (Kcal/mol)
1	Me	OMe.NH-Ph.Alkyl	Yes	Me	OMe	NH-Ph	alkyl	OMe.NH-Ph	-0.17	0.00719	2.14327111	1.19331	1.423988756	0.95201	0.797789342	1.050409134	0.02135849	0.025487299	0.017898526	10.4	108.16	3.5	12.25	3.08	9.4864	2.47	6.1009	3.35	11.2225	2.6	6.76	2.14	4.5796	4.07	16.5649	3.15	9.9225	2.88	8.2944	5.851888889	34.24460357	31.79	12.13	2.17	49.41	388.05	15.45	8.84	65.14
2	Et	OMe.NH-Ph.Alkyl	Yes	Et	OMe	NH-Ph	alkyl	OMe.NH-Ph	-0.15	0.00613	2.212539525	1.23492	1.525027406	1.41056	1.142227837	0.708938294	-0.149391564	-0.18448663	-0.120972666	11	121	3.7	13.69	3.74	13.9876	2.83	8.0089	3.81	14.5161	3.05	9.3025	2.38	5.6644	4.56	20.7936	3.62	13.1044	3.31	10.9561	7.309433333	53.42781565	33.63	12.14	2.61	49.41	417.96	15.45	8.87	160.6
3	Pr	OMe.NH-Ph.Alkyl	Yes	Pr	OMe	NH-Ph	alkyl	OMe.NH-Ph	-0.13	0.00699	2.155522824	1.2497	1.56175009	1.24179	0.993670481	0.805289139	-0.094048158	-0.117531983	-0.075256588	11.6	134.56	4.1	16.81	4.17	17.3889	3.3	10.89	4.2	17.64	3.51	12.3201	2.61	6.8121	5.05	25.5025	4.18	17.4724	3.85	14.8225	9.034122222	81.61536433	35.48	12.08	3.06	49.41	447.96	15.45	8.75	163.04
4	Bu	OMe.NH-Ph.Alkyl	Yes	Bu	OMe	NH-Ph	alkyl	OMe.NH-Ph	-0.16	0.00779	2.108462542	1.32175	1.747023063	1.16909	0.884501608	0.855366139	-0.067847946	-0.089678022	-0.051331905	12.2	148.84	4.5	20.25	4.63	21.4369	3.76	14.1376	4.76	22.6576	3.96	15.6816	2.84	8.0656	5.54	30.6916	4.75	22.5625	4.39	19.2721	10.94236667	119.7353883	37.32	12.08	3.5	49.41	477.94	15.45	8.75	165.46
5	tBu	OMe.NH-Ph.Alkyl	Yes	tBu	OMe	NH-Ph	alkyl	OMe.NH-Ph	-0.2	0.01036	1.98464	1.29244	1.670401154	1.01572	0.785893349	0.984523294	-0.006774004	-0.008754994	-0.005241252	11.9	141.61	4.5	20.25	4.72	22.2784	3.67	13.4689	4.6	21.16	3.51	12.3201	2.84	8.0656	5.43	29.4849	4.53	20.5209	4.18	17.4724	10.09794444	101.968482	37.32	12.16	3.2	49.41	484.32	15.45	8.92	84.1
6	Pentyl	OMe.NH-Ph.Alkyl	No	Pen	OMe	NH-Ph	alkyl	OMe.NH-Ph	-0.15	0.00951	2.021819483	1.2484	1.55850256	1.12591	0.901882409	0.888170458	-0.051503676	-0.06429719	-0.041255748	12.7	161.29	4.9	24.01	5.02	25.2004	4.22	17.8084	5.27	27.7729	4.42	19.5364	3.06	9.3636	6.03	36.3609	5.32	28.3024	4.93	24.3049	13.03592222	169.9352682	39.17	12.08	3.95	49.41	507.93	15.45	8.75	167.91
7	Decyl	OMe.NH-Ph.Alkyl	Yes	Dec	OMe	NH-Ph	alkyl	OMe.NH-Ph		0.28839	0.54	0.96494	0.931109204	0.02308	0.023918586	43.32755633	1.636764196	1.579379243	1.696234165	14.5	210.25	6.8	46.24	7.11	50.5521	6.54	42.7716	7.79	60.6841	6.7	44.89	5.03	25.3009	8.49	72.0801	7.11	50.5521	7.64	58.3696	25.31034444	640.6135359	48.4	12.08	6.17	49.41	665.1	15.45	8.75	103.66
8	OH	OMe.NH-Ph.O-R'	No	OH	OMe	NH-Ph	O-R'	OMe.NH-Ph	-0.37	0.06884	1.162159138	1.41974	2.015661668	0.22875	0.16112105	4.371584699	0.640638897	0.909540668	0.451236774	8.8	77.44	2.9	8.41	2.58	6.6564	1.86	3.4596	2.42	5.8564	1.84	3.3856	1.11	1.2321	2.69	7.2361	1.89	3.5721	2.16	4.6656	2.790655556	7.78775843	30.62	9.49	1.35	69.64	367.08	15.45	8.49	156.71
9	OMe	OMe.NH-Ph.O-R'	Yes	OMe	OMe	NH-Ph	O-R'	OMe.NH-Ph	-0.27	0.01967	1.7062	1.28872	1.660799238	0.63812	0.495157986	1.567103366	0.195097643	0.251426235	0.151388698	9.8	96.04	3.2	10.24	2.86	8.1796	2.05	4.2025	2.95	8.7025	2.09	4.3681	1.35	1.8225	3.6	12.96	2.63	6.9169	2.48	6.1504	4.246388889	18.0318186	32.53	11.99	1.5	58.64	398.53	15.45	8.54	236.42
10	OEt	OMe.NH-Ph.O-R'	Yes	OEt	OMe	NH-Ph	O-R'	OMe.NH-Ph	-0.24	0.01356	1.86774031	1.2827	1.64531929	0.7859	0.612691978	1.272426517	0.104632711	0.134212379	0.081572239	10.5	110.25	3.6	12.96	3.37	11.3569	2.49	6.2001	3.33	11.0889	2.44	5.9536	1.59	2.5281	4.09	16.7281	3.05	9.3025	2.85	8.1225	5.392477778	29.07881658	34.37	11.94	1.85	58.64	429.96	15.45	8.44	237.17
11	OCF3	OMe.NH-Ph.O-R'	Yes	OCF3	OMe	NH-Ph	O-R'	OMe.NH-Ph	0.35	0.02313	1.635824367	1.31434	1.727489636	0.47032	0.357837394	2.126211941	0.327606553	0.430586397	0.24925556	11	121	4.1	16.81	3.76	14.1376	2.99	8.9401	3.87	14.9769	4.23	17.8929	1.71	2.9241	4.57	20.8849	3.88	15.0544	3.69	13.6161	8.315144444	69.14162713	31.8	11.54	3.09	58.64	414.64	15.42	7.64	306.65
12	SMe	OMe.NH-Ph.S-R'	Yes	SMe	OMe	NH-Ph	S-R'	OMe.NH-Ph	0	0.02603	1.58453	1.2931	1.67210761	0.49405	0.382066352	2.024086631	0.306229096	0.395984845	0.236817799	10.4	108.16	3.9	15.21	3.2	10.24	2.66	7.0756	3.33	11.0889	2.65	7.0225	2.14	4.5796	4.12	16.9744	3.46	11.9716	3.02	9.1204	6.215344444	38.63050656	34.9	12.01	2.28	49.41	408.2	15.39	8.62	180.13
13	F	OMe.NH-Ph.Halogen	Yes	F	OMe	NH-Ph	Halogen	OMe.NH-Ph	0.06	0.02077	1.682563503	1.17885	1.389687323	0.47403	0.402112228	2.109571124	0.324194172	0.3821763	0.275008841	9.6	92.16	3.6	12.96	2.92	8.5264	2.22	4.9284	3.06	9.3636	2.31	5.3361	2.02	4.0804	3.72	13.8384	2.88	8.2944	2.61	6.8121	5.009922222	25.09932067	29.67	11.77	1.8	49.41	363.06	15.41	8.16	155.34
14	Cl	OMe.NH-Ph.Halogen	Yes	Cl	OMe	NH-Ph	Halogen	OMe.NH-Ph	0.23	0.0155	1.809668302	1.26522	1.600781648	0.6611	0.522517823	1.512630464	0.179732843	0.227401587	0.142056593	10.3	106.09	3.8	14.44	3.49	12.1801	2.77	7.6729	3.58	12.8164	2.77	7.6729	2.14	4.5796	4.17	17.3889	3.34	11.1556	3.14	9.8596	6.261888889	39.21125246	31.87	11.73	2.26	49.41	372.52	15.37	8.15	155.34
15	Br	OMe.NH-Ph.Halogen	Yes	Br	OMe	NH-Ph	Halogen	OMe.NH-Ph	0.23	0.02362	1.626720107	1.37262	1.884085664	0.44363	0.323199429	2.254130694	0.352979093	0.484506162	0.257157183	10.5	110.25	4	16	3.62	13.1044	2.86	8.1796	3.71	13.7641	2.86	8.1796	2.26	5.1076	4.41	19.4481	3.51	12.3201	3.2	10.24	6.8106	46.38427236	32.73	11.71	2.42	49.41	376.54	15.39	8.08	154.45
16	I	OMe.NH-Ph.Halogen	No	I	OMe	NH-Ph	Halogen	OMe.NH-Ph	0.18	0.02212	1.655214877	1.28762	1.657965264	0.5099	0.396001926	1.961168857	0.292514988	0.376648149	0.227174934	10.8	116.64	4	16	3.76	14.1376	3.09	9.5481	3.98	15.8404	2.69	7.2361	2.38	5.6644	4.69	21.9961	3.78	14.2884	3.16	9.9856	7.320555556	53.59053364	35.05	11.69	2.58	49.41	382.09	15.39	8.03	154.43
17	CN	OMe.NH-Ph.CN	Yes	CN	OMe	NH-Ph	Cyanide	OMe.NH-Ph	0.66	0.01674	1.776244546	1.47844	2.185784834	0.82985	0.561301101	1.205037055	0.081000402	0.119754234	0.05478775	9	81	3	9	2.68	7.1824	1.97	3.8809	2.65	7.0225	1.99	3.9601	1.28	1.6384	3.62	13.1044	2.44	5.9536	2.23	4.9729	4.024055556	16.19302311	31.84	11.71	1.51	73.2	374.26	15.29	8.19	163.78
18	SO2Me	OMe.NH-Ph.S-R'	Yes	SO2Me	OMe	NH-Ph	S-R'	OMe.NH-Ph	0.72	0.0494	1.306273051	1.59143	2.532649445	0.31384	0.197206286	3.186336987	0.503291705	0.800953518	0.316251236	8.2	67.24	2.6	6.76	2.11	4.4521	1.22	1.4884	1.77	3.1329	1.63	2.6569	1.24	1.5376	2.09	4.3681	2.24	5.0176	1.75	3.0625	2.503355556	6.266789038	36	11.34	0.49	83.55	449.82	15.7	8.01	102.3
19	CH2py	OMe.NH-CH2-Py.H	No - added	2-picoline	OMe	NH-CH2-Py	H	OMe.NH-CH2-Py		0.19654	0.706549048	0.85324	0.728018498	0.09194	0.107753973	10.87665869	1.036495501	0.884379421	1.214776031			2.2	4.84	1.88	3.5344	0.97	0.9409	1.43	2.0449	1.12	1.2544	1.11	1.2321	1.89	3.5721	1.7	2.89	1.41	1.9881	1.797622222	3.231445654	30.95	11.49	0.6	62.3	380.1	15.45	7.52	63.64
20	Me	OMe.NH.Alkyl	Yes	Me	OMe	NH	alkyl	OMe.NH		0.34586	0.461099663	1.29565	1.678708923	0.03698	0.028541659	27.04164413	1.432033093	1.855413677	1.105262296	7	49	1.3	1.69	1.03	1.0609	0.58	0.3364	1.2	1.44	0.25	0.0625	0.82	0.6724	1.73	2.9929	1.15	1.3225	0.95	0.9025	1.105588889	1.222326791	22.26	11.68	0.02	49.41	283.98	15.45	7.91	96.62
21	Et	OMe.NH.Alkyl	No	Et	OMe	NH	alkyl	OMe.NH		0.09208	1.035834689	1.07582	1.157388672	0.21498	0.199828968	4.651595497	0.667601941	0.718219521	0.620551711	7.7	59.29	1.7	2.89	1.55	2.4025	1.01	1.0201	1.58	2.4964	0.6	0.36	1.1	1.21	2.22	4.9284	1.57	2.4649	1.32	1.7424	1.752588889	3.071567813	24.1	11.71	0.37	49.41	314.72	15.45	7.96	97.83
22	Pr	OMe.NH.Alkyl	Yes	Pr	OMe	NH	alkyl	OMe.NH		0.02736	1.562883907	1.03739	1.076178012	0.51685	0.498221498	1.93479733	0.286635479	0.29735278	0.276304456	8.5	72.25	2	4	2.03	4.1209	1.48	2.1904	2.08	4.3264	1.13	1.2769	1.37	1.8769	2.71	7.3441	1.93	3.7249	1.85	3.4225	2.5792	6.65227264	25.94	11.73	0.89	49.41	344.78	15.45	8.01	100.35
23	Bu	OMe.NH.Alkyl	Yes	Bu	OMe	NH	alkyl	OMe.NH		0.0116	1.935542011	0.85699	0.73443186	0.74289	0.86685959	1.346094307	0.129075488	0.110616402	0.150614929	9.3	86.49	2.4	5.76	2.46	6.0516	1.94	3.7636	2.64	6.9696	1.58	2.4964	1.63	2.6569	3.2	10.24	2.5	6.25	2.21	4.8841	3.640366667	13.25226947	27.79	11.76	1.34	49.41	373.06	15.45	8.06	53.35
24	Pen	OMe.NH.Alkyl	Yes	Pen	OMe	NH	alkyl	OMe.NH		0.00648	2.188424994	1.17753	1.386576901	1.45658	1.2369791	0.686539703	-0.163334342	-0.192331088	-0.138709283	10.2	104.04	2.8	7.84	2.99	8.9401	2.41	5.8081	3.14	9.8596	2.04	4.1616	1.89	3.5721	3.69	13.6161	3.07	9.4249	2.75	7.5625	4.912744444	24.13505798	29.63	11.77	1.78	49.41	404.24	15.45	8.09	56.74
25	Hex	OMe.NH.Alkyl	Yes	Hex	OMe	NH	alkyl	OMe.NH		0.005	2.301029996	1.18867	1.412936369	1.50389	1.265187142	0.66494225	-0.177216072	-0.210651428	-0.149087696	10.9	118.81	3.2	10.24	3.52	12.3904	2.87	8.2369	3.65	13.3225	2.5	6.25	2.14	4.5796	4.18	17.4724	3.64	13.2496	3.29	10.8241	6.366844444	40.53670818	31.47	11.79	2.23	49.41	434.81	15.45	8.13	57.69
26	Hep	OMe.NH.Alkyl	Yes	Hep	OMe	NH	alkyl	OMe.NH		0.00451	2.345823458	1.51257	2.287868005	1.52398	1.007543453	0.65617659	-0.182979268	-0.276768951	-0.120972429	11.5	132.25	3.6	12.96	4.02	16.1604	3.33	11.0889	4.15	17.2225	2.95	8.7025	2.38	5.6644	4.67	21.8089	4.21	17.7241	3.83	14.6689	7.993322222	63.89320015	33.32	11.72	2.67	49.41	464.71	15.45	7.99	60.54
27	Oct	OMe.NH.Alkyl	Yes	Oct	OMe	NH	alkyl	OMe.NH		0.00312	2.505845406	1.0697	1.14425809	2.63126	2.459811162	0.380046062	-0.420163764	-0.449449178	-0.392786542	12.1	146.41	4	16	4.79	22.9441	3.8	14.44	4.66	21.7156	3.41	11.6281	3.53	12.4609	5.16	26.6256	4.77	22.7529	4.37	19.0969	10.52305556	110.7346982	35.16	11.72	3.12	49.41	494.69	15.45	7.99	61.69
28	Non	OMe.NH.Alkyl	Yes	Non	OMe	NH	alkyl	OMe.NH		0.0038	2.420216403	1.09531	1.199703996	1.63283	1.490746912	0.612433628	-0.212940971	-0.233236375	-0.194411601	12.6	158.76	4.4	19.36	5.1	26.01	4.26	18.1476	5.16	26.6256	3.86	14.8996	3.76	14.1376	5.66	32.0356	5.34	28.5156	4.91	24.1081	12.56871111	157.972499	37.01	11.72	3.56	49.41	526.27	15.45	7.99	64.48
29	Dec	OMe.NH.Alkyl	Yes	Dec	OMe	NH	alkyl	OMe.NH		0.0053	2.27572413	1.32819	1.764088676	1.53735	1.157477469	0.650469965	-0.186772752	-0.248069702	-0.140622014	13.1	171.61	4.8	23.04	5.36	28.7296	4.73	22.3729	5.67	32.1489	4.32	18.6624	3.99	15.9201	6.15	37.8225	5.91	34.9281	5.45	29.7025	14.79478889	218.8857783	38.85	11.72	4.01	49.41	557.3	15.45	7.99	65.24
30	Dodec	OMe.NH.Alkyl	Yes	Dodec	OMe	NH	alkyl	OMe.NH		0.00731	2.136082623	1.15405	1.331831403	1.08997	0.94447381	0.917456444	-0.037414545	-0.043178255	-0.032420211	13.8	190.44	5.6	31.36	6.14	37.6996	5.66	32.0356	6.68	44.6224	5.23	27.3529	4.43	19.6249	7.13	50.8369	7.05	49.7025	6.54	42.7716	19.76635556	390.7088119	42.54	11.72	4.9	49.41	618.06	15.45	7.99	70.55
31	Iso	OMe.NH.Alkyl	Yes	Iso	OMe	NH	alkyl	OMe.NH		0.01125	1.948847478	1.20205	1.444924203	0.94054	0.782446654	1.063219002	0.02662273	0.032001852	0.022147772	9.2	84.64	2.3	5.29	2.24	5.0176	1.82	3.3124	2.32	5.3824	1.45	2.1025	1.63	2.6569	3.13	9.7969	2.23	4.9729	2.29	5.2441	3.362133333	11.30394055	27.29	11.75	1.26	49.41	372.5	15.45	8.06	55.62
32	31	OMe.NH.Alkyl	Yes	31	OMe	NH	alkyl	OMe.NH		0.00668	2.175223538	1.05064	1.10384441	1.01452	0.965620955	0.985687813	-0.006260613	-0.00657765	-0.005958857	10	100	2.7	7.29	2.84	8.0656	2.28	5.1984	2.85	8.1225	1.84	3.3856	1.89	3.5721	3.62	13.1044	3.01	9.0601	2.64	6.9696	4.680244444	21.90468806	29.63	11.77	1.63	49.41	403.25	15.45	8.09	59.85
33	(CH2)3OCH3	OMe.NH.alkyl-O-R	No - added	C3H6OMe	OMe	NH	alkyl-O-R	OMe.NH		0.09767	1.010238812	0.96266	0.926714276	0.22351	0.232184262	4.473982647	0.650694295	0.62639737	0.675933658			1.7	2.89	1.5	2.25	0.98	0.9604	1.46	2.1316	0.19	0.0361	0.85	0.7225	1.94	3.7636	1.32	1.7424	1.16	1.3456	1.302733333	1.697114138	28.48	11.68	0.03	58.64	389.65	15.45	7.9	56.84
34	H	OBn.NH-Ph.Alkyl	No	H	OBn	NH-Ph	alkyl	OBn.NH-Ph		0.01565	1.805485658	1.32058	1.743931536	0.74379	0.563229793	1.344465508	0.128549665	0.169760116	0.097343338	11.5	132.25	4.7	22.09	4.4	19.36	3.53	12.4609	4.49	20.1601	3.69	13.6161	3.06	9.3636	5.23	27.3529	4.42	19.5364	4.01	16.0801	10.031	100.620961	39.64	12.06	3.38	49.41	461.99	15.45	8.74	77.38
35	tBu	OBn.NH-Ph.Alkyl	Yes	tBu	OBn	NH-Ph	alkyl	OBn.NH-Ph		0.01162	1.934793872	1.19969	1.439256096	0.7082	0.590319166	1.4120305	0.149844078	0.179766441	0.124902331	13.1	171.61	6	36	5.94	35.2836	5.05	25.5025	6.2	38.44	5.09	25.9081	3.9	15.21	7.14	50.9796	6.24	38.9376	5.68	32.2624	17.67614444	312.4460824	46.94	12.13	4.92	49.41	589.95	15.45	8.86	97.46
36	Pentyl	OBn.NH-Ph.Alkyl	No - added	Pen	OBn	NH-Ph	alkyl	OBn.NH-Ph		0.01234	1.90868484	0.85732	0.734997582	0.3212	0.374647304	3.113396498	0.493234433	0.422859744	0.575321272			6.5	42.25	6.46	41.7316	5.59	31.2481	6.86	47.0596	6	36	4.1	16.81	7.74	59.9076	7.03	49.4209	6.43	41.3449	21.49316667	461.9562134	48.79	12.07	5.67	49.41	617	15.45	8.79	105.69
37	OMe	OBn.NH-Ph.O-R'	Yes	OMe	OBn	NH-Ph	O-R'	OBn.NH-Ph		0.01334	1.87484417	1.44971	2.101659084	0.62698	0.432486497	1.594947207	0.202746312	0.293923357	0.139853014	11.6	134.56	4.7	22.09	4.38	19.1844	3.42	11.6964	4.55	20.7025	3.68	13.5424	2.49	6.2001	5.31	28.1961	4.34	18.8356	3.98	15.8404	9.619355556	92.5320013	42.14	12	3.22	58.64	510.18	15.45	4.56	88.46
38	py	OBn.NH-Py.H	Yes	Py	OBn	NH-Py	H	OBn.NH-Py		0.00878	2.056505484	1.42571	2.032649004	1.69297	1.1874605	0.590676418	-0.228650368	-0.325989116	-0.160376492	11.3	127.69	4.1	16.81	3.3	10.89	2.93	8.5849	3.59	12.8881	3.08	9.4864	2.86	8.1796	4.68	21.9024	3.9	15.21	3.27	10.6929	8.063155556	65.01447751	38.72	10.43	2.76	62.3	454.49	15.61	8.41	74.67
39	Pr	OBn.NH-alkyl	No	Pr	OBn	NH	alkyl	OBn.NH		0.01957	1.708409174	1.13632	1.291223142	0.60318	0.530818783	1.657879903	0.219553067	0.249482541	0.193214118	10.7	114.49	3.6	12.96	3.62	13.1044	2.85	8.1225	3.67	13.4689	2.71	7.3441	2.61	6.8121	4.42	19.5364	3.64	13.2496	3.34	11.1556	7.073577778	50.03550258	35.55	11.7	2.62	49.41	450.09	15.45	7.94	124.41
40	Pen	OBn.NH-alkyl	Yes	Pen	OBn	NH	alkyl	OBn.NH		0.00968	2.014124643	1.74418	3.042163872	1.16341	0.667024046	0.859542208	-0.065732792	-0.114649822	-0.037686932	11.9	141.61	4.4	19.36	4.49	20.1601	3.78	14.2884	4.74	22.4676	3.62	13.1044	3.06	9.3636	5.4	29.16	4.78	22.8484	4.24	17.9776	10.6196	112.7759042	39.24	11.73	3.51	49.41	510.4	15.45	8.01	72.19
41	Non	OBn.NH-alkyl	No - added	Non	OBn	NH	alkyl	OBn.NH		0.00517	2.286509457	1.14582	1.312903472	1.03633	0.904448249	0.964939043	-0.015500121	-0.017760349	-0.013527536			6	36	6.07	36.8449	5.63	31.6969	6.76	45.6976	5.45	29.7025	4.83	23.3289	7.36	54.1696	7.05	49.7025	6.11	37.3321	20.85594444	434.9704187	46.63	11.69	5.29	49.41	629.98	15.45	7.94	139.13
42	Dec	OBn.NH-alkyl	Yes	Dec	OBn	NH	alkyl	OBn.NH		0.02044	1.689519109	0.92909	0.863208228	0.42001	0.452066	2.380895693	0.376740369	0.35002571	0.405493945	13.9	193.21	6.3	39.69	6.42	41.2164	6.09	37.0881	7.26	52.7076	5.9	34.81	5.03	25.3009	7.85	61.6225	7.62	58.0644	6.95	48.3025	23.68308889	560.8886993	48.47	11.69	5.73	49.41	664.76	15.45	7.94	96.96
43	Dodec	OBn.NH-alkyl	No - added	Dodec	OBn	NH	alkyl	OBn.NH		0.06164	1.2101399	0.26473	0.07008	0.18617	0.703244815	5.37143471	0.730090301	0.193276805	2.757867643			7.1	50.41	7.14	50.9796	7.02	49.2804	8.24	67.8976	6.82	46.5124	5.43	29.4849	8.84	78.1456	8.76	76.7376	8.03	64.4809	29.86227778	891.7556341	52.16	11.69	6.62	49.41	725.82	15.45	7.94	100.68
[truncated: 302 more columns]
